# Supplementary material for: Lower and Upper Gastrointestinal Symptoms Differ Between Individuals With Irritable Bowel Syndrome With Constipation or Chronic Idiopathic Constipation
Source: PubMed Central journal article supplement — J Neurogastroenterol Motil. 2018 Apr 1;24(2):299–306. doi: 10.5056/jnm17112 (PMC5885729; doi:10.5056/jnm17112), 2018-04-01
Supplement: jnm-24-299_suppl.pdf [file jnm-24-299_suppl.pdf]

**Supplementary Table.** Disease Definitions for Irritable Bowel Syndrome With Constipation and Chronic Idiopathic Constipation

The following questions were used in the National GI Survey to identify subjects with Rome III irritable bowel syndrome with constipation or chronic idiopathic constipation.

**Definition of Irritable Bowel Syndrome With Constipation**

Subjects must report at least “2” of the following:

Is your belly pain related to passing bowel movements? (subject must report that pain improves)

When your belly pain starts do you notice a change in how often you have bowel movements (either more frequently or less frequently)?

When your belly pain starts do you notice a change in the appearance of your stool (either harder or looser stools)?

*and*

Over the past 3 months have you had abdominal pain or discomfort for at least 3 days per month?

*and*

You have recently been experiencing belly pain. How long have you been having this pain? (subject must report at least 180 days)

*and*

You have recently been experiencing constipation. How long have you been having constipation? (subject must report at least 180 days)

*and*

Subjects must not have reported diarrhea symptoms in responses to the Gastrointestinal patient reported outcomes measurement information system (GI-PROMIS) questionnaire.

**Definition of Chronic Idiopathic Constipation**

Must report 2 or more of the following:

Do you need to strain during at least 25% of bowel movements?

Do you have lumpy or hard stools in at least 25% of bowel movements?

Do you feel that you have not passed all of your stool for at least 25% of bowel movements?

Do you have a sensation of a blockage in your anus for at least 25% of bowel movements?

Do you need to press on or around your bottom to remove stool for at least 25% of your bowel movements?

Do you have fewer than 3 defecations per week?

*and*

Do you generally not have loose stools unless you use laxatives? (subject must report yes)

*and*

Insufficient criteria for irritable bowel syndrome as described above.

*and*

You have recently been experiencing constipation. How long have you been having constipation? (subject must report at least 180 days)

*and*

Subjects must not have reported diarrhea symptoms in responses to the GI-PROMIS questionnaire.
